# Supplementary material for: Impact of an integrated Structured BOPPPS model Workshop conducted on Arterial Blood Gas (ABG) Analysis Skills and Knowledge Among MBBS Students.
Source: Research Square preprint supplement (doi:10.21203/rs.3.rs-6591957/v1), 2025-06-18

**Paired Samples T-Test**

| Paired Samples T-Test | | | | | | | | | | | | | | | |
| --- | --- | --- | --- | --- | --- | --- | --- | --- | --- | --- | --- | --- | --- | --- | --- |
|  | |  | |  | | **statistic** | | **df** | | **p** | |  | | **Effect Size** | |
| Post Test |  | Pretest |  | Student's t |  | 5.97 |  | 19.0 |  | < .001 |  | Cohen's d |  | 1.34 |  |
| Note. Hₐ μ Measure 1 - Measure 2 ≠ 0 | | | | | | | | | | | | | | | |
|  | | | | | | | | | | | | | | | |

| Descriptives | | | | | | | | | | | |
| --- | --- | --- | --- | --- | --- | --- | --- | --- | --- | --- | --- |
|  | | **N** | | **Mean** | | **Median** | | **SD** | | **SE** | |
| Post Test |  | 20 |  | 14.25 |  | 14.0 |  | 2.92 |  | 0.652 |  |
| Pretest |  | 20 |  | 9.80 |  | 10.0 |  | 2.57 |  | 0.574 |  |
|  | | | | | | | | | | | |

**Plots**

**Post Test - Pretest**


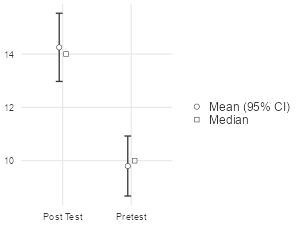


**One-Way ANOVA**

| **One-Way ANOVA (Welch's)** | | | | | | | | | |
| --- | --- | --- | --- | --- | --- | --- | --- | --- | --- |
|  | | **F** | | **df1** | | **df2** | | **p** | |
| **Pretest** |  | **0.4157** |  | **2** |  | **15.7** |  | **0.667** |  |
| **Post Test** |  | **0.2114** |  | **2** |  | **10.6** |  | **0.813** |  |
| **Difference** |  | **0.0247** |  | **2** |  | **10.9** |  | **0.976** |  |
|  | | | | | | | | | |

| **Group Descriptives** | | | | | | | | | | | |
| --- | --- | --- | --- | --- | --- | --- | --- | --- | --- | --- | --- |
|  | | **Year of MBBS** | | **N** | | **Mean** | | **SD** | | **SE** | |
| **Pretest** |  | **MBBS 4th year** |  | **9** |  | **10.33** |  | **2.40** |  | **0.799** |  |
|  |  | **MBBS 2th year** |  | **10** |  | **9.50** |  | **3.72** |  | **1.176** |  |
|  |  | **MBBS 3th year** |  | **8** |  | **9.25** |  | **2.60** |  | **0.921** |  |
| **Post Test** |  | **MBBS 4th year** |  | **6** |  | **14.50** |  | **1.64** |  | **0.671** |  |
|  |  | **MBBS 2th year** |  | **7** |  | **14.71** |  | **3.25** |  | **1.229** |  |
|  |  | **MBBS 3th year** |  | **7** |  | **13.57** |  | **3.64** |  | **1.378** |  |
| **Difference** |  | **MBBS 4th year** |  | **6** |  | **4.67** |  | **2.16** |  | **0.882** |  |
|  |  | **MBBS 2th year** |  | **7** |  | **4.29** |  | **4.23** |  | **1.599** |  |
|  |  | **MBBS 3th year** |  | **7** |  | **4.43** |  | **3.64** |  | **1.378** |  |
|  | | | | | | | | | | | |

**Plots**

**Pretest**

**
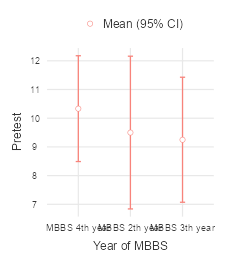
**

**Post Test**

**
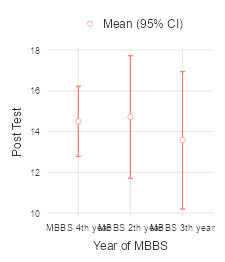
**

**Difference**

**
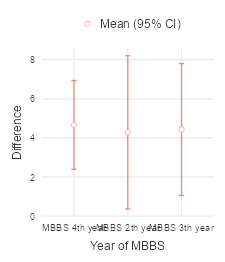
**

**Descriptives analysis of gender-based differences:**

| Descriptives | | | | | | | | | |
| --- | --- | --- | --- | --- | --- | --- | --- | --- | --- |
|  | | **Gender** | | **Pretest** | | **Post Test** | | **Difference** | |
| N |  | F |  | 16 |  | 13 |  | 13 |  |
|  |  | M |  | 11 |  | 7 |  | 7 |  |
| Missing |  | F |  | 0 |  | 3 |  | 3 |  |
|  |  | M |  | 0 |  | 4 |  | 4 |  |
| Mean |  | F |  | 9.50 |  | 13.5 |  | 3.54 |  |
|  |  | M |  | 10.0 |  | 15.7 |  | 6.14 |  |
| Median |  | F |  | 10.0 |  | 14.0 |  | 4 |  |
|  |  | M |  | 9.00 |  | 17.0 |  | 7 |  |
| Standard deviation |  | F |  | 3.25 |  | 3.10 |  | 3.45 |  |
|  |  | M |  | 2.53 |  | 1.98 |  | 2.48 |  |
| Minimum |  | F |  | 1.00 |  | 7.00 |  | -3 |  |
|  |  | M |  | 6.00 |  | 13.0 |  | 3 |  |
| Maximum |  | F |  | 14.0 |  | 18.0 |  | 7 |  |
|  |  | M |  | 13.0 |  | 18.0 |  | 9 |  |
|  | | | | | | | | | |

| One-Way ANOVA (Welch's) | | | | | | | | | |
| --- | --- | --- | --- | --- | --- | --- | --- | --- | --- |
|  | | **F** | | **df1** | | **df2** | | **p** | |
| Pretest |  | 0.4157 |  | 2 |  | 15.7 |  | 0.667 |  |
| Post Test |  | 0.2114 |  | 2 |  | 10.6 |  | 0.813 |  |
| Difference |  | 0.0247 |  | 2 |  | 10.9 |  | 0.976 |  |
|  | | | | | | | | | |

**Descriptive analysis of Phase wise differences:**

| Group Descriptives | | | | | | | | | | | |
| --- | --- | --- | --- | --- | --- | --- | --- | --- | --- | --- | --- |
|  | | **Year of MBBS** | | **N** | | **Mean** | | **SD** | | **SE** | |
| Pretest |  | MBBS 4th year |  | 9 |  | 10.33 |  | 2.40 |  | 0.799 |  |
|  |  | MBBS 2th year |  | 10 |  | 9.50 |  | 3.72 |  | 1.176 |  |
|  |  | MBBS 3th year |  | 8 |  | 9.25 |  | 2.60 |  | 0.921 |  |
| Post Test |  | MBBS 4th year |  | 6 |  | 14.50 |  | 1.64 |  | 0.671 |  |
|  |  | MBBS 2th year |  | 7 |  | 14.71 |  | 3.25 |  | 1.229 |  |
|  |  | MBBS 3th year |  | 7 |  | 13.57 |  | 3.64 |  | 1.378 |  |
| Difference |  | MBBS 4th year |  | 6 |  | 4.67 |  | 2.16 |  | 0.882 |  |
|  |  | MBBS 2th year |  | 7 |  | 4.29 |  | 4.23 |  | 1.599 |  |
|  |  | MBBS 3th year |  | 7 |  | 4.43 |  | 3.64 |  | 1.378 |  |
|  | | | | | | | | | | | |

**Plots**

**Pretest**


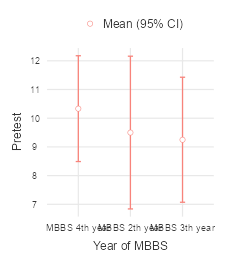


**Post Test**


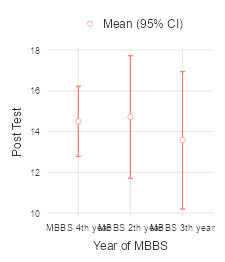


**Difference**


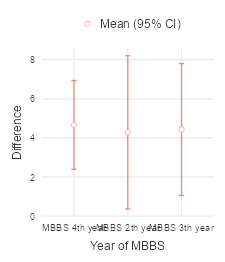


**Gender based analysis of One-Way ANOVA**

| One-Way ANOVA (Welch's) | | | | | | | | | |
| --- | --- | --- | --- | --- | --- | --- | --- | --- | --- |
|  | | **F** | | **df1** | | **df2** | | **p** | |
| Pretest |  | 0.202 |  | 1 |  | 24.5 |  | 0.657 |  |
| Post Test |  | 3.914 |  | 1 |  | 17.3 |  | 0.064 |  |
| Difference |  | 3.777 |  | 1 |  | 16.2 |  | 0.069 |  |
|  | | | | | | | | | |

| Group Descriptives | | | | | | | | | | | |
| --- | --- | --- | --- | --- | --- | --- | --- | --- | --- | --- | --- |
|  | | **Gender** | | **N** | | **Mean** | | **SD** | | **SE** | |
| Pretest |  | F |  | 16 |  | 9.50 |  | 3.25 |  | 0.811 |  |
|  |  | M |  | 11 |  | 10.00 |  | 2.53 |  | 0.763 |  |
| Post Test |  | F |  | 13 |  | 13.46 |  | 3.10 |  | 0.859 |  |
|  |  | M |  | 7 |  | 15.71 |  | 1.98 |  | 0.747 |  |
| Difference |  | F |  | 13 |  | 3.54 |  | 3.45 |  | 0.958 |  |
|  |  | M |  | 7 |  | 6.14 |  | 2.48 |  | 0.937 |  |
|  | | | | | | | | | | | |

**Plots**

**Pretest**


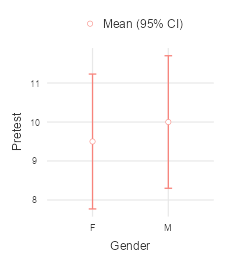


**Post Test**


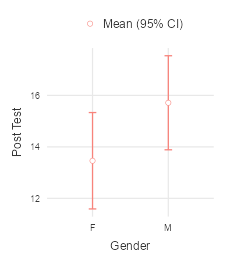


**Difference**


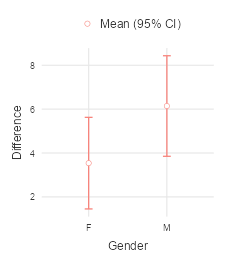

Supplement: Supplementary file 1 [file 4dfb8310721985b4c08b4a78.docx]
