# Supplementary material for: Impact of an integrated Structured BOPPPS model Workshop conducted on Arterial Blood Gas (ABG) Analysis Skills and Knowledge Among MBBS Students.
Source: Research Square preprint supplement (doi:10.21203/rs.3.rs-6591957/v1), 2025-06-18
Supplement: Supplementary file 1 [file 224d85ae93784f1123fbda9c.pdf]

| Timestamp          | Name of the research participant: | By clicking on the "I Agree" button, I consent to be a part of the study. |
|--------------------|-----------------------------------|---------------------------------------------------------------------------|
| 1/4/2025 13:21:54  | Student 1                         | I Agree                                                                   |
| 1/4/2025 16:17:25  | Student 2                         | I Agree                                                                   |
| 1/4/2025 16:20:21  | Student 3                         | I Agree                                                                   |
| 1/4/2025 16:26:23  | Student 4                         | I Agree                                                                   |
| 1/4/2025 16:45:21  | Student 5                         | I Agree                                                                   |
| 1/4/2025 21:42:42  | Student 6                         | I Agree                                                                   |
| 1/4/2025 22:23:02  | Student 7                         | I Agree                                                                   |
| 1/4/2025 23:15:50  | Student 8                         | I Agree                                                                   |
| 1/5/2025 8:10:52   | Student 9                         | I Agree                                                                   |
| 1/10/2025 20:18:20 | Student 10                        | I Agree                                                                   |
| 2/1/2025 2:18:09   | Student 11                        | I Agree                                                                   |
| 3/22/2025 8:29:23  | Student 12                        | I Agree                                                                   |
| 3/22/2025 8:54:10  | Student 13                        | I Agree                                                                   |
| 3/23/2025 5:54:36  | Student 14                        | I Agree                                                                   |
| 3/24/2025 13:50:18 | Student 15                        | I Agree                                                                   |
| 3/24/2025 13:51:39 | Student 16                        | I Agree                                                                   |
| 3/24/2025 13:54:01 | Student 17                        | I Agree                                                                   |
| 3/24/2025 14:13:15 | Student 18                        | I Agree                                                                   |
| 3/24/2025 14:22:09 | Student 19                        | I Agree                                                                   |
| 3/28/2025 20:10:37 | Student 20                        | I Agree                                                                   |
| 3/28/2025 20:27:20 | Student 21                        | I Agree                                                                   |
| 3/28/2025 20:32:18 | Student 22                        | I Agree                                                                   |
| 3/28/2025 20:37:52 | Student 23                        | I Agree                                                                   |
| 3/28/2025 21:02:26 | Student 24                        | I Agree                                                                   |
| 3/29/2025 5:23:06  | Student 25                        | I Agree                                                                   |
